# Supplementary material for: The Mediating Effect of Cytokines on the Association between Fungal Sensitization and Poor Clinical Outcome in Asthma
Source: MDPI journal article supplement (doi:10.3390/biomedicines10061452), 2022-06-19
Supplement: s1 [file s1]

**Supplemental Table S1**

|                                                    | Male<br>(N=39) | Female<br>(N=58) | P-values |
|----------------------------------------------------|----------------|------------------|----------|
| IL-17A level                                       | 0.328±0.422    | 0.417±0.548      | 0.369    |
| Correlation between IL-17A<br>and Candida albicans | 0.233          | 0.458            | 0.166    |
